# Supplementary material for: Serum miRNA expression profile as a prognostic biomarker of stage II/III colorectal adenocarcinoma
Source: PubMed Central journal article supplement (PMC4528229; doi:10.1038/srep12921), 2015-08-07

**Serum miRNA expression profile as a prognostic biomarker of stage II/III colorectal adenocarcinoma**

Jialu Li <sup>a,b,†</sup>, Yang Liu <sup>c,†</sup>, Cheng Wang <sup>d,†</sup>, Ting Deng <sup>a,†</sup>, Hongwei Liang <sup>b</sup>, Yifei Wang<sup>e</sup>, Dingzhi Huang <sup>a</sup>, Qian Fan <sup>a,b</sup>, Xia Wang <sup>a</sup>, Tao Ning <sup>a</sup>, Rui Liu <sup>a</sup>, Chen-Yu Zhang <sup>b,\*</sup>, Ke Zen <sup>b,\*</sup>, Xi Chen <sup>b,\*</sup> and Yi Ba <sup>a,\*</sup>

<sup>a</sup>Tianjin Medical University Cancer Institute and Hospital, Key Laboratory of Cancer Prevention and Therapy, Huanhuxi Rd., Ti Yuanbei, Tianjin 300060, China.

<sup>b</sup>Jiangsu Engineering Research Center for microRNA Biology and Biotechnology, State Key Laboratory of Pharmaceutical Biotechnology, School of Life Sciences, Nanjing University, 22 Hankou Rd., Nanjing 210093, Nanjing, China.

<sup>c</sup>Department of Pathology, The Third Xiangya Hospital, Central South University, Changsha, Hunan, China.

<sup>d</sup>Department of Clinical Laboratory, Jinling Hospital, Clinical School of Medical College, Nanjing University, Nanjing, China.

<sup>e</sup>Department of Neurology, Second Affiliated Hospital, Harbin Medical University, Harbin, China.

<sup>†</sup>These authors contributed equally to this work.

Correspondence to: Yi Ba. E-mail address: [bayi@tjmuch.com](mailto:bayi@tjmuch.com). Xi Chen, Ke Zen and

Chen-Yu Zhang. E-mail address: [xichen@nju.edu.cn](mailto:xichen@nju.edu.cn). [kzen@nju.edu.cn](mailto:kzen@nju.edu.cn). and

[cyzhang@nju.edu.cn](mailto:cyzhang@nju.edu.cn)

## **Supplemental Data Methods**

### **Sample processing**

Five mL of venous blood was collected from each donor and placed in a separating gel vacuum tube. To harvest the cell-free serum, each blood sample was immediately centrifuged at 3,000 rpm for 10 min, followed by a second centrifugation at 12,000 rpm for 5 min. The serum supernatant was recovered and stored at -80°C until further analysis.

### **TDLA technology**

TDLA technology was performed as follow descriptions. Briefly, 3 µL total RNA were added to 4.5 µL of the RT reaction mix (Megaplex RT Primers 10X, dNTPs with dTTP 100mmol, MultiScribe Reverse Transcriptase 50U/µL, 10X RT Buffer, MgCl<sub>2</sub> 25 mmol, RNase Inhibitor 20 U/µL and nuclease-free water). After incubation on ice for 5 min, reverse transcription was performed using a thermal cycler (UNO-ThermobloCk, Biometra, Göttingen, Germany). MicroRNA profiling of 739 different human miRNAs was then performed using the TaqMan Low Density Array (TaqMan Array Human MicroRNA A+B Cards Set v3.0). In order to generate enough miRNA cDNA templates for the following real-time RCR, a pre-amplification was performed after the reverse transcription. All steps were performed using a 7900 HT Fast Real-Time PCR System (Applied Biosystems, Foster City, CA) and all reactions were performed following the protocols of the manufacturer. The expression data for the miRNA were presented as threshold cycle (CT) values.

### **Quantification of miRNAs by probe-based RT-qPCR**

A TaqMan probe-based RT-qPCR assay was performed according to the manufacturer's instructions (Applied Biosystems) with a minor modification. The resulting Ct values were determined using fixed threshold settings. Briefly, the reverse transcription reaction was carried out in 10  $\mu$ L mixture containing 2  $\mu$ L of extract RNA from serum, 1  $\mu$ L of 10 mmol/L dNTPs, 0.5  $\mu$ L of AMV reverse transcriptase (TaKaRa), 1  $\mu$ L of a stem-loop RT primer (Applied Biosystems), 2  $\mu$ L of 5  $\times$  reverse transcription buffer and 3.5  $\mu$ L of diethylpyroCarbonate (DEPC)-treated water. For synthesis of cDNA, the reaction mixtures were incubated at 16  $^{\circ}$ C for 30 min, at 42  $^{\circ}$ C for 30 min, at 85  $^{\circ}$ C for 5 min, and then held at 4  $^{\circ}$ C. Real-time PCR was then performed (1 cycle of 95  $^{\circ}$ C for 5 min, and 40 cycles of 95  $^{\circ}$ C for 15 sec and 60  $^{\circ}$ C for 1 min) with an Applied Biosystems 7500 Sequence Detection System. The reaction was performed with a final volume of 20  $\mu$ L containing 1  $\mu$ L of cDNA, 0.3  $\mu$ L of Taq, 0.33  $\mu$ L of hydrolysis probe (Applied Biosystems), 1.2  $\mu$ L of 25 mmol/L MgCl<sub>2</sub>, 0.4  $\mu$ L of 10 mmol/L dNTPs, 2  $\mu$ L of 10  $\times$  PCR buffer, and 14.77  $\mu$ L of DEPC water. All reactions, including controls no template RNA, were performed in triplicate.

### **Risk score analysis**

Risk score analysis was performed to evaluate the associations between the expression levels of the serum miRNAs and CRC. The risk score of each miRNA, denoted as  $s$ , was set to 1 if the expression level was greater than the upper 95% reference interval for the corresponding miRNA level in controls and to 0 otherwise.

A risk score function (RSF) to predict CRC was defined according to a linear

combination of the expression level for each miRNA. For example, the RSF for sample  $i$  using information from six miRNAs was:  $rsfi = \sum_{j=1}^6 W_j \cdot sij$ . In the above equation,  $sij$  is the risk score for miRNA  $j$  on sample  $i$ , and  $W_j$  is the weight of the risk score of miRNA  $j$ . To determine the  $W_s$ , six univariate logistic regression models were fitted using the disease status with each of the risk scores. The regression coefficient of each risk score was used as the weight to indicate the contribution of each miRNA to the RSF. Samples were ranked according to their RSF and then divided into a high-risk group, representing the predicted CRC cases, and a low-risk group, representing the predicted control individuals. We then used frequency tables and ROC curves to evaluate the diagnostic effects of the profiling and to find the appropriate cutoff point.

### Supplemental Data Table S1

The miRNAs recruited in the present study and their reported relevance to CRC.

| MiRNA   | Function                                                                                                                                                                                                                                 | Differential expression                                                                                                                                                                                                                                                     | Prognosis                                                                                                                                                                                                                                                                                             |
|---------|------------------------------------------------------------------------------------------------------------------------------------------------------------------------------------------------------------------------------------------|-----------------------------------------------------------------------------------------------------------------------------------------------------------------------------------------------------------------------------------------------------------------------------|-------------------------------------------------------------------------------------------------------------------------------------------------------------------------------------------------------------------------------------------------------------------------------------------------------|
| miR-21  | Promoting the proliferation and reducing apoptosis of colon cancer (Asangani IA et al., 2008; Liu M et al., 2011; Bakirtzi K et al., 2011; Zhang J et al., 2012; Faltejskova P et al., 2012; Vicinus B et al., 2012; Yu Y et al., 2012;) | Up-regulation in colon tumor tissue (Slaby O et al., 2007; Schetter et al., 2008; Wang P et al., 2009; Schetter AJ et al., 2009; Baffa R et al., 2009; Chang KH et al., 2010; Chang KH et al., 2011; Schee K et al., 2012; Kanaan et al., 2012; Faltejskova P et al., 2012) | High miR-21 expression associated with poor survival and poor therapeutic outcome (Schetter AJ et al., 2009) Expression levels was higher associated with shorter disease-free survival (Nielsen BS et al., 2011) High expression level of miR-21 associated with poor survival (Kanaan et al., 2012) |
| miR-31  | Promoting proliferation and tumor cell survival (Kallioniemi O et al., 2012; Chen T)                                                                                                                                                     | Up-regulation in colon tumor tissue (Bandrés E et al., 2006; Slaby O et al., 2007; Wang CJ et al., 2009; Motoyama K et al., 2009; Chang KH et al., 2011; Schee K et al., 2012)                                                                                              |                                                                                                                                                                                                                                                                                                       |
| miR-143 | Inhibitory activity of proliferation in colon cancer cell (Akao Y et al., 2010; Borralho PM et al., 2011; Zhang Y et al., 2012; Bauer KM1 et al., 2012; Gregersen LH et al.; 2012 Li X et al., 2012)                                     | Down-regulation in colon tumor tissue (Slaby O et al., 2007; Wang CJ et al., 2009; Chen X et al., 2009; Motoyama K et al., 2009; Chang KH et al., 2011)                                                                                                                     |                                                                                                                                                                                                                                                                                                       |
| miR145  | Antitumor effect in human colon cells (Akao Y et al., 2010; Zhang J et al., 2011; Wang Z et al., 2012; Xu Q et al., 2012)                                                                                                                | Down-regulation in colon tumor tissue (Michael MZ et al., 2003; Bandrés E et al., 2006; Slaby O et al., 2007; Schepeler T et al., 2008; Wang CJ et al., 2009; Motoyama K et al., 2009)                                                                                      |                                                                                                                                                                                                                                                                                                       |

## Supplemental Data Table S2

Differentially expressed miRNAs in pre-operative CRC serum samples compared to healthy control serum samples determined by TLDA.

| miRNA           | Ct of healthy control | Ct of pre-operative<br>CRC | - $\Delta$ Ct (pre-operative -<br>control) |
|-----------------|-----------------------|----------------------------|--------------------------------------------|
| hsa-miR-337-5p  | 40.00                 | 15.74                      | 24.26                                      |
| hsa-miR-216a    | 40.00                 | 18.86                      | 21.14                                      |
| hsa-miR-193a-3p | 40.00                 | 19.79                      | 20.21                                      |
| hsa-miR-504     | 40.00                 | 20.57                      | 19.43                                      |
| hsa-miR-17      | 40.00                 | 21.95                      | 18.05                                      |
| hsa-miR-106a    | 40.00                 | 21.96                      | 18.04                                      |
| hsa-miR-382     | 40.00                 | 22.79                      | 17.21                                      |
| hsa-miR-1233    | 40.00                 | 22.95                      | 17.05                                      |
| hsa-miR-21      | 40.00                 | 22.97                      | 17.03                                      |
| hsa-miR-380-3p  | 40.00                 | 22.98                      | 17.02                                      |
| hsa-miR-654-3p  | 40.00                 | 23.62                      | 16.38                                      |
| hsa-miR-208b    | 40.00                 | 23.73                      | 16.27                                      |
| hsa-miR-409-5p  | 40.00                 | 24.93                      | 15.07                                      |
| hsa-miR-122     | 40.00                 | 24.96                      | 15.04                                      |
| hsa-miR-331-5p  | 40.00                 | 24.96                      | 15.04                                      |
| hsa-miR-1260    | 40.00                 | 25.04                      | 14.96                                      |
| hsa-miR-515-5p  | 40.00                 | 25.72                      | 14.28                                      |
| hsa-miR-142-5p  | 40.00                 | 25.95                      | 14.05                                      |
| hsa-miR-214     | 40.00                 | 26.00                      | 14.00                                      |
| hsa-miR-486     | 40.00                 | 26.01                      | 13.99                                      |
| hsa-miR-1305    | 40.00                 | 26.02                      | 13.98                                      |
| hsa-miR-139-3p  | 40.00                 | 26.03                      | 13.97                                      |
| hsa-miR-672     | 40.00                 | 26.29                      | 13.71                                      |
| hsa-miR-412     | 40.00                 | 26.81                      | 13.19                                      |
| hsa-miR-365     | 40.00                 | 27.01                      | 12.99                                      |
| hsa-miR-132     | 40.00                 | 27.07                      | 12.93                                      |
| hsa-miR-224     | 40.00                 | 27.69                      | 12.31                                      |
| hsa-miR-492     | 40.00                 | 27.83                      | 12.17                                      |
| hsa-miR-28-3p   | 40.00                 | 27.95                      | 12.05                                      |
| hsa-miR-628-3p  | 40.00                 | 27.97                      | 12.03                                      |
| hsa-miR-769-5p  | 40.00                 | 27.98                      | 12.02                                      |
| hsa-miR-758     | 40.00                 | 27.98                      | 12.02                                      |
| hsa-miR-425#    | 40.00                 | 27.99                      | 12.01                                      |
| hsa-miR-1267    | 40.00                 | 28.01                      | 11.99                                      |

|                 |       |       |       |
|-----------------|-------|-------|-------|
| hsa-miR-629     | 40.00 | 28.01 | 11.99 |
| hsa-miR-485-3p  | 40.00 | 28.02 | 11.98 |
| hsa-miR-223#    | 40.00 | 28.03 | 11.97 |
| hsa-miR-199a    | 40.00 | 28.73 | 11.27 |
| hsa-miR-636     | 40.00 | 28.85 | 11.15 |
| hsa-miR-543     | 40.00 | 28.87 | 11.13 |
| hsa-miR-591     | 40.00 | 28.87 | 11.13 |
| hsa-miR-330     | 40.00 | 28.90 | 11.10 |
| hsa-miR-652     | 40.00 | 28.94 | 11.06 |
| hsa-miR-181a-2# | 40.00 | 28.95 | 11.05 |
| hsa-miR-516-3p  | 40.00 | 28.97 | 11.03 |
| hsa-miR-1180    | 40.00 | 28.97 | 11.03 |
| hsa-miR-1179    | 40.00 | 28.99 | 11.01 |
| hsa-miR-1262    | 40.00 | 28.99 | 11.01 |
| hsa-miR-151-5P  | 40.00 | 28.99 | 11.01 |
| hsa-miR-199a-3p | 40.00 | 29.00 | 11.00 |
| hsa-miR-204     | 40.00 | 29.00 | 11.00 |
| hsa-miR-330-5p  | 40.00 | 29.81 | 10.19 |
| hsa-miR-320B    | 40.00 | 29.93 | 10.07 |
| hsa-miR-200c    | 40.00 | 29.94 | 10.06 |
| hsa-miR-16-2#   | 40.00 | 29.94 | 10.06 |
| hsa-miR-572     | 40.00 | 29.94 | 10.06 |
| hsa-miR-518b    | 40.00 | 29.94 | 10.06 |
| hsa-miR-15b     | 40.00 | 29.95 | 10.05 |
| hsa-miR-625     | 40.00 | 29.95 | 10.05 |
| hsa-miR-95      | 40.00 | 29.95 | 10.05 |
| hsa-miR-454#    | 40.00 | 29.96 | 10.04 |
| hsa-miR-142-3p  | 40.00 | 30.01 | 9.99  |
| hsa-miR-128a    | 40.00 | 30.03 | 9.97  |
| hsa-miR-19b-1#  | 40.00 | 30.11 | 9.89  |
| hsa-miR-518f    | 40.00 | 30.90 | 9.10  |
| hsa-miR-454     | 35.04 | 25.94 | 9.09  |
| hsa-miR-519b-3p | 40.00 | 30.92 | 9.08  |
| hsa-miR-10b#    | 40.00 | 30.96 | 9.04  |
| hsa-miR-1291    | 40.00 | 30.96 | 9.04  |
| hsa-miR-378     | 40.00 | 30.97 | 9.03  |
| hsa-miR-361     | 40.00 | 30.97 | 9.03  |
| hsa-miR-148a    | 40.00 | 30.98 | 9.02  |
| hsa-miR-539     | 40.00 | 30.98 | 9.02  |
| hsa-miR-99b#    | 40.00 | 31.00 | 9.00  |
| hsa-miR-561     | 40.00 | 31.09 | 8.91  |
| hsa-miR-627     | 40.00 | 31.89 | 8.11  |
| hsa-miR-886-3p  | 40.00 | 31.91 | 8.09  |
| hsa-miR-1269    | 40.00 | 31.92 | 8.08  |



|                 |       |       |        |
|-----------------|-------|-------|--------|
| hsa-miR-1227    | 40.00 | 31.93 | 8.07   |
| hsa-miR-523     | 40.00 | 31.93 | 8.07   |
| hsa-miR-191#    | 40.00 | 31.97 | 8.03   |
| hsa-miR-1271    | 40.00 | 31.99 | 8.01   |
| hsa-miR-1243    | 40.00 | 31.99 | 8.01   |
| hsa-miR-942     | 40.00 | 32.00 | 8.00   |
| hsa-miR-136     | 40.00 | 32.01 | 7.99   |
| hsa-miR-488     | 40.00 | 32.01 | 7.99   |
| hsa-miR-146b    | 35.96 | 27.98 | 7.97   |
| hsa-miR-489     | 40.00 | 32.04 | 7.96   |
| hsa-miR-362     | 40.00 | 32.16 | 7.84   |
| hsa-miR-203     | 40.00 | 32.93 | 7.07   |
| hsa-miR-744     | 40.00 | 32.94 | 7.06   |
| hsa-miR-629     | 40.00 | 32.94 | 7.06   |
| hsa-miR-1300    | 40.00 | 32.94 | 7.06   |
| hsa-miR-196b    | 40.00 | 33.01 | 6.99   |
| hsa-miR-888     | 40.00 | 33.02 | 6.98   |
| hsa-miR-26b     | 27.07 | 20.96 | 6.10   |
| hsa-miR-1276    | 40.00 | 33.91 | 6.09   |
| hsa-miR-106b#   | 40.00 | 33.99 | 6.01   |
| hsa-miR-339-5p  | 40.00 | 34.01 | 5.99   |
| hsa-miR-144#    | 40.00 | 34.04 | 5.96   |
| hsa-miR-548c-5p | 40.00 | 34.09 | 5.91   |
| hsa-miR-376a    | 36.06 | 30.94 | 5.12   |
| hsa-miR-185     | 40.00 | 34.92 | 5.08   |
| hsa-miR-517b    | 40.00 | 34.96 | 5.04   |
| hsa-miR-23a#    | 40.00 | 34.97 | 5.03   |
| hsa-miR-151-3p  | 29.97 | 24.95 | 5.02   |
| hsa-miR-106b    | 25.97 | 31.03 | -5.06  |
| hsa-miR-1289    | 33.03 | 40.00 | -6.97  |
| hsa-miR-141#    | 26.00 | 33.06 | -7.06  |
| hsa-miR-340     | 32.00 | 40.00 | -8.00  |
| hsa-miR-324-5p  | 31.90 | 40.00 | -8.10  |
| hsa-miR-181a    | 31.85 | 40.00 | -8.15  |
| hsa-miR-202     | 16.91 | 25.98 | -9.07  |
| hsa-miR-548d    | 29.95 | 40.00 | -10.05 |
| hsa-miR-576-3p  | 28.97 | 40.00 | -11.03 |
| hsa-miR-381     | 21.97 | 33.01 | -11.04 |
| hsa-miR-548a    | 28.95 | 40.00 | -11.05 |
| hsa-miR-125b    | 28.06 | 40.00 | -11.94 |
| hsa-miR-10a     | 28.05 | 40.00 | -11.95 |
| hsa-miR-423-5p  | 27.00 | 40.00 | -13.00 |
| hsa-miR-194     | 14.70 | 28.01 | -13.31 |
| hsa-miR-520c-3p | 15.96 | 29.87 | -13.91 |

|                |       |       |        |
|----------------|-------|-------|--------|
| hsa-miR-302a   | 20.95 | 40.00 | -19.05 |
| hsa-miR-628-5p | 8.97  | 32.98 | -24.01 |
| hsa-miR-651    | 13.28 | 40.00 | -26.72 |
| hsa-miR-302c   | 9.42  | 40.00 | -30.58 |

---

### Supplemental Data Table S3

Differentially expressed miRNAs in pre-operative CRC serum samples compared to post-operative CRC serum samples determined by TLDA.

| miRNA          | Ct of pre-operative<br>CRC | Ct of post-operative<br>CRC | -ΔCt (pre-operative –<br>post-operative) |
|----------------|----------------------------|-----------------------------|------------------------------------------|
| hsa-miR-1274B  | 19.88                      | 40.00                       | 20.12                                    |
| hsa-miR-504    | 20.57                      | 40.00                       | 19.43                                    |
| hsa-miR-382    | 22.79                      | 40.00                       | 17.21                                    |
| hsa-miR-601    | 22.94                      | 40.00                       | 17.06                                    |
| hsa-miR-1233   | 22.95                      | 40.00                       | 17.05                                    |
| hsa-miR-484    | 22.95                      | 40.00                       | 17.05                                    |
| hsa-miR-380-3p | 22.98                      | 40.00                       | 17.02                                    |
| hsa-let-7b     | 23.01                      | 40.00                       | 16.99                                    |
| hsa-miR-654-3p | 23.62                      | 40.00                       | 16.38                                    |
| hsa-miR-1274A  | 23.93                      | 40.00                       | 16.07                                    |
| hsa-miR-126#   | 23.98                      | 40.00                       | 16.02                                    |
| hsa-let-7e     | 23.99                      | 40.00                       | 16.01                                    |
| hsa-miR-145    | 24.00                      | 40.00                       | 16.00                                    |
| hsa-miR-197    | 24.01                      | 40.00                       | 15.99                                    |
| hsa-miR-409-5p | 24.93                      | 40.00                       | 15.07                                    |
| hsa-miR-151-3p | 24.95                      | 40.00                       | 15.05                                    |
| hsa-miR-331-5p | 24.96                      | 40.00                       | 15.04                                    |
| hsa-miR-30b    | 24.98                      | 40.00                       | 15.02                                    |
| hsa-miR-766    | 25.00                      | 40.00                       | 15.00                                    |
| hsa-miR-26a    | 25.01                      | 40.00                       | 14.99                                    |
| hsa-miR-1260   | 25.04                      | 40.00                       | 14.96                                    |
| hsa-miR-515-5p | 25.72                      | 40.00                       | 14.28                                    |
| hsa-miR-34b    | 25.80                      | 40.00                       | 14.20                                    |
| hsa-miR-574-3p | 25.91                      | 40.00                       | 14.09                                    |
| hsa-miR-133a   | 25.97                      | 40.00                       | 14.03                                    |
| hsa-miR-139-5p | 26.00                      | 40.00                       | 14.00                                    |
| hsa-miR-486    | 26.01                      | 40.00                       | 13.99                                    |
| hsa-miR-1305   | 26.02                      | 40.00                       | 13.98                                    |
| hsa-miR-139-3p | 26.03                      | 40.00                       | 13.97                                    |
| hsa-miR-30d    | 26.03                      | 40.00                       | 13.97                                    |
| hsa-miR-1303   | 26.23                      | 40.00                       | 13.77                                    |
| hsa-miR-672    | 26.29                      | 40.00                       | 13.71                                    |
| hsa-miR-412    | 26.81                      | 40.00                       | 13.19                                    |
| hsa-miR-218-1# | 26.83                      | 40.00                       | 13.17                                    |

|                 |       |       |       |
|-----------------|-------|-------|-------|
| hsa-miR-532-3p  | 26.89 | 40.00 | 13.11 |
| hsa-miR-221     | 26.94 | 40.00 | 13.06 |
| hsa-miR-625#    | 26.95 | 40.00 | 13.05 |
| hsa-miR-27a     | 26.97 | 40.00 | 13.03 |
| hsa-miR-432     | 26.98 | 40.00 | 13.02 |
| hsa-miR-193b    | 26.98 | 40.00 | 13.02 |
| hsa-miR-125a-5p | 26.98 | 40.00 | 13.02 |
| hsa-miR-30a-3p  | 26.99 | 40.00 | 13.01 |
| hsa-miR-331     | 27.00 | 40.00 | 13.00 |
| hsa-miR-365     | 27.01 | 40.00 | 12.99 |
| hsa-miR-409-3p  | 27.01 | 40.00 | 12.99 |
| hsa-miR-1183    | 27.04 | 40.00 | 12.96 |
| hsa-miR-132     | 27.07 | 40.00 | 12.93 |
| hsa-miR-130a#   | 27.07 | 40.00 | 12.93 |
| hsa-miR-224     | 27.69 | 40.00 | 12.31 |
| hsa-miR-492     | 27.83 | 40.00 | 12.17 |
| hsa-miR-505#    | 27.91 | 40.00 | 12.09 |
| hsa-miR-324-3p  | 27.93 | 40.00 | 12.07 |
| hsa-miR-28-3p   | 27.95 | 40.00 | 12.05 |
| hsa-miR-206     | 27.95 | 40.00 | 12.05 |
| hsa-miR-628-3p  | 27.97 | 40.00 | 12.03 |
| hsa-miR-769-5p  | 27.98 | 40.00 | 12.02 |
| hsa-let-7c      | 27.98 | 40.00 | 12.02 |
| hsa-miR-146b    | 27.98 | 40.00 | 12.02 |
| hsa-miR-758     | 27.98 | 40.00 | 12.02 |
| hsa-miR-375     | 27.99 | 40.00 | 12.01 |
| hsa-miR-425#    | 27.99 | 40.00 | 12.01 |
| hsa-miR-1267    | 28.01 | 40.00 | 11.99 |
| hsa-miR-629     | 28.01 | 40.00 | 11.99 |
| hsa-miR-485-3p  | 28.02 | 40.00 | 11.98 |
| hsa-miR-223#    | 28.03 | 40.00 | 11.97 |
| hsa-miR-320     | 23.98 | 35.94 | 11.96 |
| hsa-miR-638     | 28.14 | 40.00 | 11.86 |
| hsa-miR-199a    | 28.73 | 40.00 | 11.27 |
| hsa-miR-636     | 28.85 | 40.00 | 11.15 |
| hsa-miR-543     | 28.87 | 40.00 | 11.13 |
| hsa-miR-591     | 28.87 | 40.00 | 11.13 |
| hsa-miR-330     | 28.90 | 40.00 | 11.10 |
| hsa-miR-885-5p  | 28.92 | 40.00 | 11.08 |
| hsa-miR-652     | 28.94 | 40.00 | 11.06 |
| hsa-miR-181a-2# | 28.95 | 40.00 | 11.05 |
| hsa-miR-127     | 28.97 | 40.00 | 11.03 |
| hsa-miR-1180    | 28.97 | 40.00 | 11.03 |
| hsa-miR-100     | 28.98 | 40.00 | 11.02 |

|                 |       |       |       |
|-----------------|-------|-------|-------|
| hsa-miR-140-3p  | 28.98 | 40.00 | 11.02 |
| hsa-miR-520D-3P | 28.98 | 40.00 | 11.02 |
| hsa-miR-1179    | 28.99 | 40.00 | 11.01 |
| hsa-miR-1262    | 28.99 | 40.00 | 11.01 |
| hsa-miR-151-5P  | 28.99 | 40.00 | 11.01 |
| hsa-miR-199a-3p | 29.00 | 40.00 | 11.00 |
| hsa-miR-26b#    | 29.01 | 40.00 | 10.99 |
| hsa-miR-330-5p  | 29.81 | 40.00 | 10.19 |
| hsa-miR-720     | 21.93 | 32.03 | 10.10 |
| hsa-miR-152     | 29.90 | 40.00 | 10.10 |
| hsa-miR-886-5p  | 29.90 | 40.00 | 10.10 |
| hsa-miR-320B    | 29.93 | 40.00 | 10.07 |
| hsa-miR-328     | 29.93 | 40.00 | 10.07 |
| hsa-miR-200c    | 29.94 | 40.00 | 10.06 |
| hsa-miR-16-2#   | 29.94 | 40.00 | 10.06 |
| hsa-miR-572     | 29.94 | 40.00 | 10.06 |
| hsa-miR-518b    | 29.94 | 40.00 | 10.06 |
| hsa-miR-15b     | 29.95 | 40.00 | 10.05 |
| hsa-miR-95      | 29.95 | 40.00 | 10.05 |
| hsa-miR-454#    | 29.96 | 40.00 | 10.04 |
| hsa-miR-339-3p  | 29.96 | 40.00 | 10.04 |
| hsa-miR-193a-5p | 29.98 | 40.00 | 10.02 |
| hsa-miR-323-3p  | 29.98 | 40.00 | 10.02 |
| hsa-miR-642     | 30.00 | 40.00 | 10.00 |
| hsa-miR-30c     | 23.99 | 33.99 | 10.00 |
| hsa-miR-142-3p  | 30.01 | 40.00 | 9.99  |
| hsa-miR-19b-1#  | 30.11 | 40.00 | 9.89  |
| hsa-miR-494     | 30.91 | 40.00 | 9.09  |
| hsa-miR-125a-3p | 30.94 | 40.00 | 9.06  |
| hsa-miR-376a    | 30.94 | 40.00 | 9.06  |
| hsa-miR-27a#    | 30.95 | 40.00 | 9.05  |
| hsa-miR-10b#    | 30.96 | 40.00 | 9.04  |
| hsa-miR-1291    | 30.96 | 40.00 | 9.04  |
| hsa-miR-378     | 30.97 | 40.00 | 9.03  |
| hsa-miR-361     | 30.97 | 40.00 | 9.03  |
| hsa-miR-148a    | 30.98 | 40.00 | 9.02  |
| hsa-miR-539     | 30.98 | 40.00 | 9.02  |
| hsa-miR-28      | 30.99 | 40.00 | 9.01  |
| hsa-miR-296     | 30.99 | 40.00 | 9.01  |
| hsa-miR-223     | 16.96 | 25.97 | 9.01  |
| hsa-miR-99b#    | 31.00 | 40.00 | 9.00  |
| hsa-miR-1290    | 17.96 | 26.95 | 8.99  |
| hsa-miR-483-5p  | 23.97 | 32.92 | 8.95  |
| hsa-miR-335     | 31.05 | 40.00 | 8.95  |

|                |       |       |      |
|----------------|-------|-------|------|
| hsa-miR-561    | 31.09 | 40.00 | 8.91 |
| hsa-miR-195    | 24.01 | 32.89 | 8.87 |
| hsa-miR-337-5p | 15.74 | 23.87 | 8.14 |
| hsa-miR-545    | 31.88 | 40.00 | 8.12 |
| hsa-miR-627    | 31.89 | 40.00 | 8.11 |
| hsa-miR-93#    | 31.91 | 40.00 | 8.09 |
| hsa-miR-886-3p | 31.91 | 40.00 | 8.09 |
| hsa-miR-1269   | 31.92 | 40.00 | 8.08 |
| hsa-miR-1227   | 31.93 | 40.00 | 8.07 |
| hsa-miR-523    | 31.93 | 40.00 | 8.07 |
| hsa-miR-191#   | 31.97 | 40.00 | 8.03 |
| hsa-miR-218    | 31.97 | 40.00 | 8.03 |
| hsa-miR-342-3p | 23.94 | 31.95 | 8.01 |
| hsa-miR-1271   | 31.99 | 40.00 | 8.01 |
| hsa-miR-942    | 32.00 | 40.00 | 8.00 |
| hsa-miR-511    | 32.00 | 40.00 | 8.00 |
| hsa-miR-422a   | 32.01 | 40.00 | 7.99 |
| hsa-miR-136    | 32.01 | 40.00 | 7.99 |
| hsa-miR-488    | 32.01 | 40.00 | 7.99 |
| hsa-miR-92a    | 25.01 | 33.00 | 7.98 |
| hsa-miR-18a#   | 32.03 | 40.00 | 7.97 |
| hsa-miR-489    | 32.04 | 40.00 | 7.96 |
| hsa-miR-345    | 27.98 | 35.93 | 7.96 |
| hsa-miR-362    | 32.16 | 40.00 | 7.84 |
| hsa-miR-30a-5p | 24.94 | 32.02 | 7.08 |
| hsa-miR-203    | 32.93 | 40.00 | 7.07 |
| hsa-miR-744    | 32.94 | 40.00 | 7.06 |
| hsa-miR-629    | 32.94 | 40.00 | 7.06 |
| hsa-miR-1300   | 32.94 | 40.00 | 7.06 |
| hsa-miR-645    | 32.96 | 40.00 | 7.04 |
| hsa-miR-20b    | 29.00 | 36.04 | 7.04 |
| hsa-miR-372    | 32.96 | 40.00 | 7.04 |
| hsa-miR-122    | 24.96 | 31.99 | 7.03 |
| hsa-miR-597    | 32.98 | 40.00 | 7.02 |
| hsa-miR-99b    | 26.98 | 34.00 | 7.02 |
| hsa-miR-184    | 32.99 | 40.00 | 7.01 |
| hsa-miR-222    | 22.98 | 29.99 | 7.01 |
| hsa-miR-150    | 21.00 | 28.00 | 7.00 |
| hsa-miR-502-3p | 33.00 | 40.00 | 7.00 |
| hsa-miR-381    | 33.01 | 40.00 | 6.99 |
| hsa-miR-196b   | 33.01 | 40.00 | 6.99 |
| hsa-miR-888    | 33.02 | 40.00 | 6.98 |
| hsa-miR-24     | 20.00 | 26.97 | 6.96 |
| hsa-miR-141#   | 33.06 | 40.00 | 6.94 |

|                 |       |       |        |
|-----------------|-------|-------|--------|
| hsa-miR-191     | 19.98 | 26.89 | 6.91   |
| hsa-miR-182     | 30.95 | 37.06 | 6.11   |
| hsa-miR-1276    | 33.91 | 40.00 | 6.09   |
| hsa-miR-454     | 25.94 | 31.97 | 6.02   |
| hsa-miR-216a    | 18.86 | 24.88 | 6.02   |
| hsa-miR-106b#   | 33.99 | 40.00 | 6.01   |
| hsa-miR-339-5p  | 34.01 | 40.00 | 5.99   |
| hsa-miR-27b     | 28.01 | 34.00 | 5.99   |
| hsa-miR-214     | 26.00 | 31.96 | 5.96   |
| hsa-miR-144#    | 34.04 | 40.00 | 5.96   |
| hsa-miR-1255B   | 28.93 | 34.04 | 5.12   |
| hsa-miR-185     | 34.92 | 40.00 | 5.08   |
| hsa-miR-329     | 34.93 | 40.00 | 5.07   |
| hsa-miR-517b    | 34.96 | 40.00 | 5.04   |
| hsa-miR-106a    | 21.96 | 26.99 | 5.03   |
| hsa-miR-23a#    | 34.97 | 40.00 | 5.03   |
| hsa-miR-17      | 21.95 | 26.98 | 5.03   |
| hsa-miR-26b     | 20.96 | 25.98 | 5.02   |
| hsa-miR-548b-5p | 40.00 | 34.00 | -6.00  |
| hsa-miR-1254    | 40.00 | 33.98 | -6.02  |
| hsa-miR-548d    | 40.00 | 33.94 | -6.06  |
| hsa-miR-519d    | 40.00 | 33.93 | -6.07  |
| hsa-miR-618     | 30.00 | 23.91 | -6.09  |
| hsa-miR-548d-5p | 40.00 | 33.02 | -6.98  |
| hsa-miR-576-3p  | 40.00 | 33.00 | -7.00  |
| hsa-miR-190     | 35.99 | 28.98 | -7.02  |
| hsa-miR-590-5p  | 40.00 | 32.95 | -7.05  |
| hsa-miR-1       | 40.00 | 31.97 | -8.03  |
| hsa-miR-647     | 40.00 | 31.93 | -8.07  |
| hsa-miR-1184    | 40.00 | 31.81 | -8.19  |
| hsa-miR-340     | 40.00 | 30.96 | -9.04  |
| hsa-miR-517a    | 40.00 | 30.93 | -9.07  |
| hsa-miR-708     | 40.00 | 30.73 | -9.27  |
| hsa-miR-216b    | 40.00 | 30.05 | -9.95  |
| hsa-miR-548a    | 40.00 | 29.87 | -10.13 |
| hsa-miR-181a    | 40.00 | 29.10 | -10.90 |
| hsa-miR-518d    | 40.00 | 29.02 | -10.98 |
| hsa-miR-615-5p  | 40.00 | 28.88 | -11.12 |

---

### Supplemental Data Table S4

Differentially expressed miRNAs both in pre-operative CRC serum samples compared to post-operative CRC serum samples and pre-operative CRC serum samples compared to post-operative CRC serum samples determined by TLDA.

| miRNA           | Ct of healthy control | Ct of pre-operative CRC | Ct of post-operative CRC | - $\Delta$ Ct (pre-operative - control) | - $\Delta$ Ct (pre-operative - post-operative) |
|-----------------|-----------------------|-------------------------|--------------------------|-----------------------------------------|------------------------------------------------|
| hsa-miR-216a    | 40                    | 18.86                   | 24.88                    | 21.14                                   | 6.02                                           |
| hsa-miR-193a-3p | 40                    | 19.79                   | 40                       | 20.21                                   | 16.38                                          |
| hsa-miR-504     | 40                    | 20.57                   | 40                       | 19.43                                   | 19.43                                          |
| hsa-miR-106a    | 40                    | 21.96                   | 26.99                    | 18.04                                   | 5.03                                           |
| hsa-miR-382     | 40                    | 22.79                   | 40                       | 17.21                                   | 17.21                                          |
| hsa-miR-17      | 40                    | 22.97                   | 26.98                    | 17.03                                   | 5.03                                           |
| hsa-miR-214     | 40                    | 26                      | 31.96                    | 14                                      | 5.96                                           |
| hsa-miR-139-3p  | 40                    | 26.03                   | 40                       | 13.97                                   | 13.97                                          |
| hsa-miR-412     | 40                    | 26.81                   | 40                       | 13.19                                   | 13.19                                          |
| hsa-miR-199a-3p | 40                    | 29                      | 40.00                    | 11                                      | 11.00                                          |
| hsa-miR-572     | 40                    | 29.94                   | 40                       | 10.06                                   | 10.06                                          |
| hsa-miR-518b    | 40                    | 29.94                   | 40                       | 10.06                                   | 10.06                                          |
| hsa-miR-15b     | 40                    | 29.95                   | 40                       | 10.05                                   | 10.05                                          |
| hsa-miR-95      | 40                    | 29.95                   | 40                       | 10.05                                   | 9.02                                           |
| hsa-miR-627     | 40                    | 31.89                   | 40                       | 8.11                                    | 8.11                                           |
| hsa-miR-146b    | 35.96                 | 27.98                   | 40                       | 7.97                                    | 12.02                                          |
| hsa-miR-26b     | 27.07                 | 20.96                   | 25.98                    | 6.1                                     | 5.02                                           |
| hsa-miR-517b    | 40                    | 34.96                   | 40                       | 5.04                                    | 5.04                                           |



### Supplemental Data Table S5

Differentially expressed miRNAs by comparing pre-operative, postoperative CRC serum samples to healthy control serum samples validated by quantitative RT-PCR<sup>1</sup>.

| miRNA       | Healthy control | Pre-operative CRC | Post-operative CRC | P value <sup>2</sup> | P value <sup>3</sup> | Result               |
|-------------|-----------------|-------------------|--------------------|----------------------|----------------------|----------------------|
| miR-106a    | 0.30 ± 0.009    | 0.44± 0.015       | 0.29 ± 0.009       | <0.0001              | <0.0001              | significant          |
| miR-17-3p   | 0.011 ± 0.0005  | 0.019 ± 0.0008    | 0.012 ± 0.0004     | <0.0001              | <0.0001              | significant          |
| miR-145     | 0.20± 0.007     | 0.13± 0.004       | 0.19 ± 0.005       | <0.0001              | <0.0001              | Significant          |
| miR-15b     | 0.14± 0.012     | 0.15±0.009        | 0.017±0.01         | 0.22                 | 0.70                 | non-significant      |
| miR-17      | 0.15± 0.016     | 0.14±0.012        | 0.17±0.023         | 0.42                 | 0.66                 | non-significant      |
| miR-21      | 0.25± 0.006     | 0.31±0.005        | 0.32±0.006         | 0.31                 | 0.37                 | non-significant      |
| miR-26b     | 0.95±0.11       | 1.07± 0.125       | 0.95± 0.143        | 0.53                 | 0.47                 | non-significant      |
| miR-31      | 0.95 ± 0.062    | 0.94 ± 0.064      | 0.93 ± 0.135       | 0.95                 | 0.88                 | non-significant      |
| miR-139-3p  | 0.52 ±0.014     | 0.68±0.023        | 0.78±0.03          | 0.38                 | 0.27                 | non-significant      |
| miR-143     | 0.56 ± 0.03     | 0.51 ± 0.02       | 0.52 ± 0.01        | 0.35                 | 0.83                 | non-significant      |
| miR-146b    | 1.07 ±0.13      | 1.41±0.14         | 1.13±0.13          | 0.6                  | 0.08                 | non-significant      |
| miR-214     | 0.35 ±0.04      | 0.32±0.03         | 0.42±0.03          | 0.02                 | 0.84                 | non-significant      |
| miR-216a    | 0.31 ±0.06      | 0.28±0.04         | 0.36±0.06          | 0.44                 | 0.66                 | non-significant      |
| miR-193a-3p | 0.39 ± 0.060    | 0.37 ± 0.032      | 0.44± 0.033        | 0.06                 | 0.39                 | non-significant      |
| miR-199a-3p | 0.16±0.02       | 0.16±0.03         | 0.19±0.04          | 0.55                 | 0.54                 | non-significant      |
| miR-382     | 0.26 ±0.06      | 0.58±0.05         | 0.57±0.04          | 0.001                | 0.38                 | non-significant      |
| miR-412     |                 |                   |                    |                      |                      | detection rate < 75% |
| miR-517b    |                 |                   |                    |                      |                      | detection            |

|          |                                |
|----------|--------------------------------|
| miR-572  | rate < 75%<br>detection        |
| miR-518b | rate < 75%<br>Ct value ><br>35 |
| miR-504  | Ct value ><br>35               |
| miR-627  | Ct value ><br>35               |

---

<sup>1</sup>The relative contents of miRNAs are presented as mean±SEM.

<sup>2</sup> Difference between pre-operative CRC and post-operative CRC.

<sup>3</sup> Difference between pre-operative CRC and post-operative CRC.

Figure S1

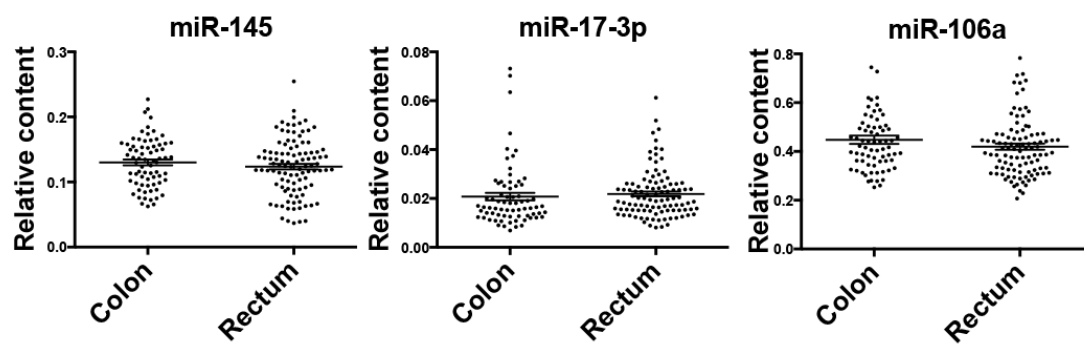

Supplement: srep12921-s1.pdf [file srep12921-s1.pdf]
